# Supplementary material for: Precisely designed Fex (x = 1–2) cluster nanocatalysts for effective nanocatalytic tumor therapy
Source: Royal Society of Chemistry journal article supplement (doi:10.1039/d2nr05869c), 2022-12-28
Supplement: d2nr05869c1.pdf [file d2nr05869c1.pdf]

## Electronic Supplementary Material

### Precisely Design of Fe<sub>x</sub> (x=1~2) Cluster Nanocatalysts for Effective Tumor Nanocatalytic Therapy

Yanfei Meng<sup>1†</sup>, Dongsheng Zhang<sup>1†</sup>, Yingzi Song<sup>1</sup>, Xinyi Yang<sup>1</sup>, Yongli Gao<sup>4</sup>, Jun Ma<sup>2\*</sup>, Zunfu Hu<sup>1,3\*</sup> and Xiuwen Zheng<sup>1,2\*</sup>

1. Key Laboratory of Functional Nanomaterials and Technology in Universities of Shandong, Linyi University, Linyi 276000, P.R. China
2. Medical College of Linyi University, Linyi 276000, P.R. China
3. School of Materials Science and Engineering, Linyi University, Linyi 276000, P. R. China
4. Linyi People's Hospital, Linyi 276000, P. R. China

## Table of Contents

|                                                          |    |
|----------------------------------------------------------|----|
| 1. Synthesis and Characterization .....                  | 3  |
| 1. 1 Main reagents .....                                 | 3  |
| 1.2 Synthesis of Fe <sub>1</sub> -N-C .....              | 3  |
| 1.3 Preparation of Fe <sub>1</sub> @DF NEs .....         | 3  |
| 1.4 Preparation of Fe <sub>2</sub> @DF NEs .....         | 3  |
| 1.5 Characterizations .....                              | 3  |
| 2. Experimental Peecedures .....                         | 4  |
| 2.1 •OH detection .....                                  | 4  |
| 2.2 Peroxidase-like activity and kinetic assay .....     | 4  |
| 2.3 Density functional theory computational method ..... | 4  |
| 2.4 Photothermal study .....                             | 5  |
| 2.5 Photothermal conversion efficiency .....             | 5  |
| 2.6 loading efficiency of TAM .....                      | 6  |
| 2.7 Cell culture .....                                   | 6  |
| 2.8 Cytotoxicity assay .....                             | 6  |
| 2.9 The cell fluorescence images .....                   | 6  |
| 2.10 Detection of intracellular GSH .....                | 7  |
| 2.11 Western blot analysis .....                         | 7  |
| 2.12 Bio-TEM analysis .....                              | 7  |
| 2.13 Antitumor therapy strategy .....                    | 7  |
| 2.14 Hemolysis assay .....                               | 8  |
| 2.15 In vivo bio-distribution Study .....                | 8  |
| 3. Supplementary Figures and Tables .....                | 9  |
| 4. Supplementary References .....                        | 60 |

## 1. Synthesis and Characterization

### 1.1 Main reagents

Zinc nitrate hexahydrate  $\text{Zn}(\text{NO}_3)_2 \cdot 6\text{H}_2\text{O}$ , AR, Sinopharm), diiron nonacarbonyl ( $\text{Fe}_2(\text{CO})_9$ ,  $\geq 97.0\%$ , Macklin), 2-methylimidazole (98%, Aldrich), methanol (AR, Sinopharm), sodium hydroxide (NaOH, AR, Sinopharm), hexadecyl trimethyl ammonium bromide (CTAB,  $\geq 99\%$ , Aldrich), tetraethyl orthosilicate (TEOS, AR, Aldrich), tamoxifen (TAM,  $\geq 99\%$ , Aldrich), DSPE-PEG-FA ( $M_v=2000$ , Sigma), DSPE-PEG-DSPE ( $M_v=2000$ , Sigma).

### 1.2 Synthesis of $\text{Fe}_1\text{-N-C}$

$\text{Zn}(\text{NO}_3)_2 \cdot 6\text{H}_2\text{O}$  (9519.68 mg) and  $\text{Fe}(\text{acac})_3$  (128 mg) were dissolved in methanol solution (500 mL), and 2-methylimidazole (11083.5 mg) was dispersed in methanol solution (400 mL). Subsequent these solutions were mixed uniformly and stirred rapidly at room temperature. After 2 h stirring, the mixture was then the aging reaction for 6 h. The  $\text{Fe}(\text{acac})_3\text{-ZIF-8}$  was collected by centrifugation and washed with methanol until the supernatant was colorless.

The  $\text{Fe}(\text{acac})_3\text{-ZIF-8}$  was dispersed in 240 mL of 10 vol% methanol and the pH of the mixture was adjusted to 11 with NaOH aqueous (1 mol  $\text{L}^{-1}$ ). Then CTAB (0.408 mM) and TEOS (1.2 mL) were added, followed by stirring rapidly for 30 minutes. The  $\text{Fe}(\text{acac})_3\text{-ZIF-8@mSiO}_2$  was collected by centrifugation and washed three times with methanol, then dried at 60°C.

The dried  $\text{Fe}(\text{acac})_3\text{-ZIF-8@mSiO}_2$  powder was pyrolyzed at 800 °C under argon atmosphere for 180 min with a heating rate of 2 °C  $\text{min}^{-1}$ , and then cooled to room temperature naturally. The obtained  $\text{Fe}_1\text{-N-C@mSiO}_2$  was etched with NaOH aqueous (1 mol  $\text{L}^{-1}$ ) for 3 h then washed with water and ethanol until until the supernatant to neutral.

### 1.3 Preparation of $\text{Fe}_1\text{@DF NEs}$

$\text{Fe}_1\text{-N-C}$  (10 mg), DSPE-PEG-DSPE (40 mg), and DSPE-PEG-FA (20 mg) were completely dissolved in water, respectively, and then mixed evenly and continuously ultrasonic for 30 min and stirred 2 h away from light. Finally,  $\text{Fe}_1\text{@DF NEs}$  were obtained after centrifugal washing.

### 1.4 Preparation of $\text{Fe}_2\text{@DF NEs}$

$\text{Fe}_2\text{-N-C}$  (10 mg), DSPE-PEG-DSPE (40 mg), and DSPE-PEG-FA (20 mg) were completely dissolved in water, respectively, and then mixed evenly and continuously ultrasonic for 30 min and stirred 2 h away from light. Finally,  $\text{Fe}_2\text{@DF NEs}$  were obtained after centrifugal washing.

### 1.5 Characterizations

The TEM and Mapping elemental characterization of the material were carried out on a TEM (JEOL JEM-2100) with a field emission gun operating at 200 kV; spherical aberration-corrected high-angle annular dark-field scanning TEM (HAADF-STEM) images are in The spherical aberration-corrected transmission electron microscope (JEM-ARM200F) of 200 kV was obtained; the UV-vis absorption spectrum was obtained on the UV-visible spectrophotometer (NANO DROP 2000); the Zeta potential of the material was measured by a nanoparticle size and potential analyzer (Nano-ZS); crystal structure was characterized on X-ray powder diffraction (D8 Advae, Bruker,

Switzerland); X-ray photoelectron spectroscopy (XPS) was tested on electron spectroscopy (Oxford); electron spin resonance Spectroscopy (ESR) was measured using Bruker EMXPLUS; elemental content was measured by inductively coupled plasma mass spectrometry (ICP-MS, iCAP Q, Thermo Flsher); thermal images were recorded using a FLIR T420 thermal imager.

## 2. Experimental Peocedures

### 2.1 •OH detection

DMPO was used as •OH trapping agent, pH=5.8 PBS as buffer solution. Add 50  $\mu\text{L}$   $\text{H}_2\text{O}_2$  solution (200 mM) and 100  $\mu\text{L}$   $\text{Fe}_1\text{-N-C}$  ( $109 \mu\text{g mL}^{-1}$ , 0.375%) or  $\text{Fe}_2\text{-N-C}$  ( $100 \mu\text{g mL}^{-1}$ , 0.41%) to 1 mL tube, then add 100  $\mu\text{L}$  DMPO solution. After 5-10 s of vortex oscillation, the liquid was transferred to a glass capillary for ESR detection. For blank samples, Fe based materials were not added.

### 2.2 Peroxidase-like activity and kinetic assay.

$\text{Fe}_x\text{-N-C}$  ( $100 \mu\text{g mL}^{-1}$ ),  $\text{H}_2\text{O}_2$  (10 mM), and TMB ( $50 \mu\text{g mL}^{-1}$ ) were added to 2 mL of PBS solution (pH 5.8). The absorbance of the color reactions was recorded after a certain reaction time using a UV-vis spectrophotometer.

Additionally, the steady-state kinetic analysis was performed at  $25^\circ\text{C}$  in PBS solution (pH 5.8) with  $\text{Fe}_x\text{-N-C}$  ( $100 \mu\text{g mL}^{-1}$ ) as a catalyst in the existence of TMB ( $100 \mu\text{g mL}^{-1}$ ) and different concentrations of  $\text{H}_2\text{O}_2$  (1.0, 2.5, 5.0, 10, 25 and 50 mM). The rates were plotted against  $\text{H}_2\text{O}_2$  content and then fitted with the Michaelis-Menten curves (**Fig. S16b**). Furthermore, a linear double-reciprocal plot was used for determining the  $K_m$  and  $V_{\max}$  (**Fig. S16c**).

$$A = \epsilon bc$$

$$v_0 = \frac{v_{\max} \cdot [S]}{K_m + [S]}$$

$$\frac{1}{v_0} = \frac{K_m}{v_{\max}} \cdot \frac{1}{[S]} + \frac{1}{v_{\max}}$$

Where  $v$  represents the initial velocity,  $K_m$  represents the Michaelis constant,  $[S]$  is the concentration of substrate, and  $V_{\max}$  is the maximal reaction velocity.

### 2.3 Density functional theory computational method

We have employed the first-principles <sup>[1,2]</sup> to perform spin-polarization density functional theory (DFT) calculations within the generalized gradient approximation (GGA) using the Perdew-Burke-Ernzerhof (PBE) <sup>[3]</sup> formulation. We have chosen the projected augmented wave (PAW) potentials <sup>[4,5]</sup> to describe the ionic cores and take valence electrons into account using a plane wave basis set with a kinetic energy cutoff of 450 eV. Partial occupancies of the Kohn-Sham orbitals were allowed using the Gaussian smearing method and a width of 0.05 eV. The electronic energy was considered self-consistent when the energy change was smaller than  $10^{-5}$  eV. A geometry optimization was considered convergent when the energy change was smaller than  $0.05 \text{ eV } \text{\AA}^{-1}$ . In our structure, the U correction is used for Fe atoms. The vacuum spacing in a direction perpendicular to the plane of the structure is 20  $\text{\AA}$  for the surfaces. The Brillouin zone integration is performed using  $3 \times 3 \times 1$

Monkhorst-Pack k-point sampling for a structure. Finally, the adsorption energies ( $E_{ads}$ ) were calculated as  $E_{ads} = E_{ad/sub} - E_{ad} - E_{sub}$ , where  $E_{ad/sub}$ ,  $E_{ad}$ , and  $E_{sub}$  are the total energies of the optimized adsorbate/substrate system, the adsorbate in the structure, and the clean substrate, respectively. The free energy was calculated using the equation:

$$G = E_{ads} + ZPE - TS$$

where  $G$ ,  $E_{ads}$ ,  $ZPE$  and  $TS$  are the free energy, total energy from DFT calculations, zero-point energy and entropic contributions, respectively.

## 2.4 Photothermal study

$Fe_2-N-C$  solutions (400  $\mu L$ ) with different concentrations (0, 50, 100 and 200  $\mu g mL^{-1}$ ) were irradiated with an 808 nm laser (1.0  $W cm^{-2}$ ) for 5 min, and the temperature changes were monitored with an infrared thermal imager. The photothermal properties of  $Fe_2-N-C$  solution (200  $\mu g mL^{-1}$ ) under different laser power densities (0.3, 0.5 and 1.0  $W cm^{-2}$ , respectively) were determined by the same method. To study the photothermal conversion effect,  $Fe_2-N-C$  solution (200  $\mu g mL^{-1}$ , 400  $\mu L$ ) was irradiated with 808 nm (1  $W cm^{-2}$ ) laser for 5 min, then the near-infrared laser was turned off, and the temperature was monitored with an infrared thermal imager.

## 2.5 Photothermal conversion efficiency

$Fe_2-N-C$  solutions (500  $\mu L$ ) with different concentrations (0, 50, 100, and 200  $\mu g mL^{-1}$ ) were irradiated with 808 nm laser (1.0  $W cm^{-2}$ ) for 6 min, and the temperature changes were monitored with an infrared thermal imager. The photothermal properties of  $Fe_2-N-C$  solution (200  $\mu g mL^{-1}$ ) under different laser power densities (0.3, 0.5, and 1.0  $W cm^{-2}$ , respectively) were measured by the same method. To study the photothermal conversion effect,  $Fe_2-N-C$  solution (200  $\mu g mL^{-1}$ , 500  $\mu L$ ) was irradiated with 808 nm (1  $W cm^{-2}$ ) laser for 5 min, then the near-infrared laser was turned off, and the temperature change was monitored with an infrared thermal imager.

Calculation of photothermic conversion efficiency ( $\eta$ ) of  $Fe_2-N-C$ :

$$\eta = \frac{hA(T_{max} - T_{sur}) - Q_s}{I(1 - 10^{-A_{808}})}$$

$T_{max}$  represents the maximum equilibrium temperature;  $T_{sur}$  is the ambient temperature.  $Q_s$  represent the heat loss due to light absorption by the container.  $I$  is the incident laser power.  $A_{808}$  is the absorbance of the sample at 808 nm.  $h$  is the heat transfer coefficient,  $A$  is the surface area of the container, and  $hA$  is calculated from **Figure S29** according to equation:

$$hA = \frac{m_s C_s}{\tau_s}$$

$\tau_s$  represents the sample system time constant,  $m_s$  and  $C_s$  are the mass and heat capacity of the solvent. According to the calculation, the  $\eta$  of the sample is calculated to be 46.8%.

## 2.6 loading efficiency of TAM

The loading efficiency of TAM was determined by UV-vis spectrophotometry. The tamoxifen was

dissolved in a methanol solution, and the volume was fixed to 10 mL to obtain 0.5g L<sup>-1</sup> tamoxifen solution. After that, 0.1, 0.2, 0.3, 0.4, 0.5, and 0.6mL of control solution were accurately absorbed and filled with methanol to 5mL in test tubes. The absorbance was determined by spectrophotometry at the maximum absorption wavelength of tamoxifen. The standard curve as follows showed the linear relationship between absorbance and TAM concentration in methanol solution, and the relationship conforms to Lambert's Law:

$$A = 0.01979 + 53.182 c$$

where A is the absorbance value and c is the mass concentration of TAM.

According to the absorbance value of the initial solution of TAM at 238 nm and the supernatant solution after reaction at the corresponding wavelength, the loading rate of TAM on Fe<sub>2</sub>@TDF NEs was calculated to be about 60.9 % according to the following equation:

$$TAM \text{ loading rate (\%)} = \frac{\text{initial mass of TAM} - \text{mass of TAM in supernatant after reaction}}{\text{initial mass of TAM}} \times 100\%$$

## 2.7 Cell culture

All cells were cultured in DMEM medium containing 2% penicillin/streptomycin and 12% fetal bovine serum at 37°C in a cell incubator in a 5% CO<sub>2</sub> atmosphere.

## 2.8 Cytotoxicity assay

Three experimental groups were set up, each with 9 replicate wells. Different materials (1) PBS; (2) Fe<sub>2</sub>@DF (100 µg mL<sup>-1</sup>); (3) Fe<sub>2</sub>@TDF (100 µg mL<sup>-1</sup>) were incubated with cells for 4 h, respectively. Then it was divided into 2 groups with 4 multiple holes in each group, and one group was irradiated with 808 laser light (0.5 W cm<sup>-2</sup>, 5 min). Culture was continued for 20 h, and the cell viability was determined by WST-1 method.

## 2.9 The cell fluorescence images

DSPE-PEG-FITC was attached to the material to study the material uptake capacity of its cells. After 4T1 cells were cultured in 6-well plates for a certain period of time, they were incubated with Fe<sub>2</sub>@TDF-FITC (200 µg mL<sup>-1</sup>) for 0.5 h, 1 h, 2 h and 4 h, respectively. This was followed by several washes with PBS to remove excess material. Then DAPI was added to each well for 20 min. The supernatant was aspirated, washed twice with PBS, and then 1 mL PBS was added and observed under a fluorescence microscope.

After culturing 4T1 cells in a 6-well culture plate for a certain period of time, use (1) PBS; (2) Fe<sub>2</sub>@DF (100 µg mL<sup>-1</sup>); (3) Fe<sub>2</sub>@TDF (100 µg mL<sup>-1</sup>); (4) Fe<sub>2</sub>@TDF+laser (0.5 W cm<sup>-2</sup>, 5 min) treatment. Incubate with AM and PI staining solution for 30 min and observe under a fluorescence microscope.

4T1 cells were treated with (1) PBS; (2) TAM (200 µg mL<sup>-1</sup>); (3) Fe<sub>2</sub>@TDF (100 µg mL<sup>-1</sup>); (4)

Fe<sub>2</sub>@TDF+laser (0.5 W cm<sup>-2</sup>, 5 min) treatment. After washing with PBS, add 1 mL cell culture medium and 1 μL BCECF-AM, and incubate in a cell incubator at 37 °C for 40 min. After washing twice with PBS, 1 mL PBS and 1 μL DAPI were added to each well, incubated in the dark for 20 min, and observed under a fluorescence microscope.

4T1 cells were treated with (1) Fe<sub>1</sub>@DF (109 μg mL<sup>-1</sup>); (2) Fe<sub>2</sub>@DF (100 μg mL<sup>-1</sup>); (3) Fe<sub>2</sub>@TDF (100 μg mL<sup>-1</sup>); (4) Fe<sub>2</sub>@TDF+laser (808 nm, 0.5 W cm<sup>-2</sup>, 5 min) treatment. Add 1 mL cell culture medium and 1 μL DCFH-DA, incubate for 40 min and observe under a fluorescence microscope.

4T1 cells were treated with (1) Fe<sub>2</sub>@DF (100 μg mL<sup>-1</sup>); (2) Fe<sub>2</sub>@TDF (100 μg mL<sup>-1</sup>); (3) Fe<sub>2</sub>@TDF+laser (0.5 W cm<sup>-2</sup>, 5 min) treatment. Add 1 mL cell culture medium and 1 μL C11-BODIPY to incubate for 40 min and observe under a fluorescence microscope.

4T1 cells were treated with (1) PBS; (2) TAM (200 μg mL<sup>-1</sup>); (3) Fe<sub>2</sub>@TDF (100 μg mL<sup>-1</sup>); (4) Fe<sub>2</sub>@TDF+laser (0.5 W cm<sup>-2</sup>, 5 min) treatment. Then, 0.5 mL cell culture medium and 0.5 mL JC-1 working solution were added to incubate for 20 min. Washed twice with 4°C JC-1 staining buffer and observed under a fluorescence microscope.

### **2.10 Detection of intracellular GSH**

4T1 cells were cultured in a 6-well plate (1×10<sup>5</sup> cells per well) and treated with (1) PBS; (2) Fe<sub>1</sub>@DF (109 μg mL<sup>-1</sup>); (3) Fe<sub>2</sub>@DF (100 μg mL<sup>-1</sup>) treatment. The content of intracellular GSH was detected using the GSH detection kit according to the instructions.

### **2.11 Western blot analysis**

4T1 cells were cultured in 6-well plates (1×10<sup>5</sup> cells per well) and treated with (1) PBS; (2) 808 nm (0.5 W cm<sup>-2</sup>, 5 min), Fe<sub>2</sub>@DF (200 μg mL<sup>-1</sup>) and Fe<sub>2</sub>@DF + laser was treated separately. Cells were then harvested with trypsin and lysed in lysis buffer. The protein content was detected by BCA protein method. The proteins were then separated by sodium dodecyl sulfate-polyacrylamide gel electrophoresis (SDS-PAGE) and transferred to polyvinylidene difluoride (PVDF) membranes. After blocking with 5% dry skim milk for 1 h, the membrane was incubated with the corresponding primary antibody on a shaker at 4°C overnight, followed by secondary antibody incubation (1 h at room temperature). Then, the membranes were visualized by the ECL plus detection system.

### **2.12 Bio-TEM analysis**

4T1 cells were placed in a petri dish (1×10<sup>6</sup> cells) and treated with PBS and Fe<sub>2</sub>@TDF (100 μg mL<sup>-1</sup>) for 12 h respectively. Cells were subsequently collected for biological transmission electron microscopy imaging.

### **2.13 Antitumor therapy strategy**

Female BALB/c mice, 6 weeks old, average weight 17-22 g, from Jinan Pengyue Laboratory Animal Breeding Co., Ltd. All experiments involving animals were kept in strict accordance with the relevant regulations and requirements of the Animal Experiment Center of Linyi University.

A tumor-bearing mouse model was established by subcutaneously injecting 4T1 cells into the right hind leg of BALB/c mice. When the tumor grew to a certain volume, the tumor-bearing mice

were randomly divided into 6 groups with 5 mice in each group: (1) PBS; (2) TAM (200  $\mu\text{g mL}^{-1}$ ); (3)  $\text{Fe}_1\text{@DF}$  (546  $\mu\text{g mL}^{-1}$ ); (4)  $\text{Fe}_2\text{@DF}$  (500  $\mu\text{g mL}^{-1}$ ); (5)  $\text{Fe}_2\text{@TDF}$  (500  $\mu\text{g mL}^{-1}$ ); (6)  $\text{Fe}_2\text{@TDF}$ +laser (0.5 W  $\text{cm}^{-2}$ , 5 min). All materials were injected intravenously, with the exception of TAM, which was injected intratumorally. Treatment every 5 days for a total of 3 times.

Body weight and tumor size were recorded every two days after starting treatment, and the formula was as follows:

$$V = W^2 \times L \times 0.5$$

where  $V$  is the tumor volume,  $W$  is the tumor width, and  $L$  is the tumor length.

After 15 days, each mouse was euthanized, and its main organs (heart, liver, spleen, lung, kidney) and tumor tissues were removed, fixed with 4% paraformaldehyde at 4 °C for 24 h, and sliced for H&E. and TUNEL staining. Subsequently, nuclei were stained with DAPI. Tumor sections were photographed with a fluorescence microscope.

#### 2.14 Hemolysis assay

Taking water as the positive control, PBS as the negative control, and different concentrations of  $\text{Fe}_2\text{@TDF}$  materials as the experimental group, they were incubated with the treated red blood cell suspension for 4 h, the samples were centrifuged and the UV-vis absorbance of the supernatants at 540 nm was measured. The hemolysis rate is calculated by the following formula:

$$\text{Hemolysis Rate (\%)} = \frac{A_{b_{\text{sample}}} - A_{b_{\text{negative}}}}{A_{b_{\text{positive}}} - A_{b_{\text{negative}}}} \times 100\%$$

#### 2.15 In vivo bio-distribution Study

After 7 days treatment, major organs (heart, liver, spleen, lung, and kidney) were collected and fixed in 4% neutral-buffered formalin. After weighting, 10% of the weight was solubilized in 1 mL of aqua regia under heating for 1 h and then diluted with DI water to 50 mL for the measurement Fe by ICP-MS.



### 3. Supplementary Figures and Tables

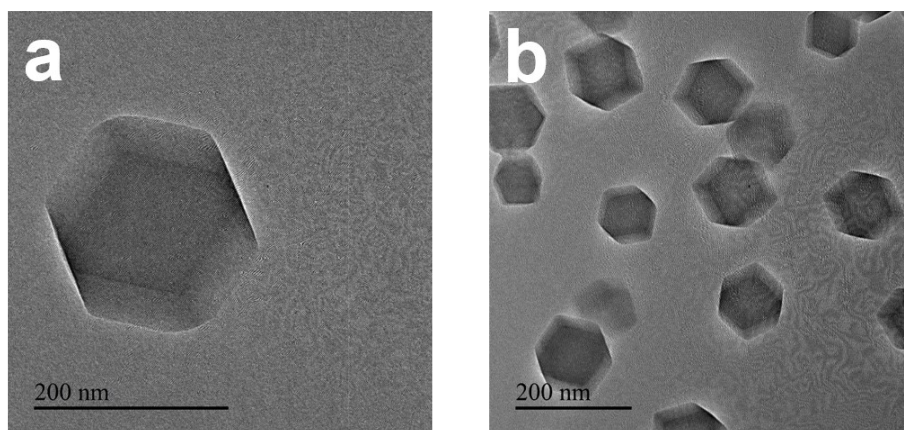

Fig. S1 TEM images of  $\text{Fe}_2(\text{CO})_9$ -ZIF-8.

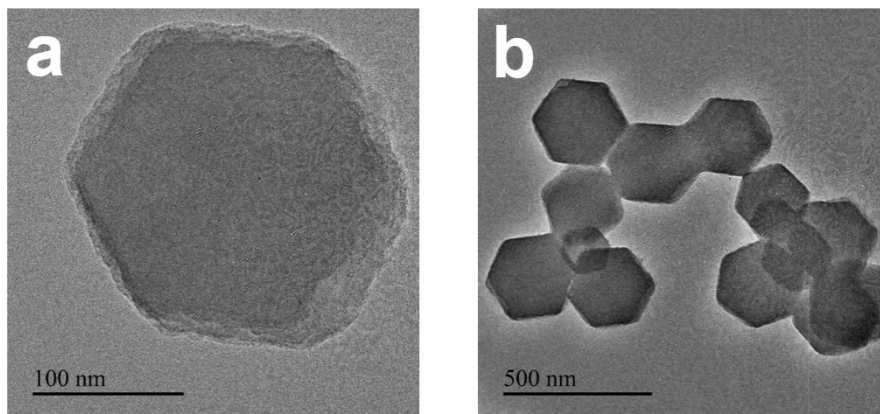

Fig. S2 TEM images of Fe<sub>2</sub>(CO)<sub>9</sub>-ZIF-8@mSiO<sub>2</sub>.

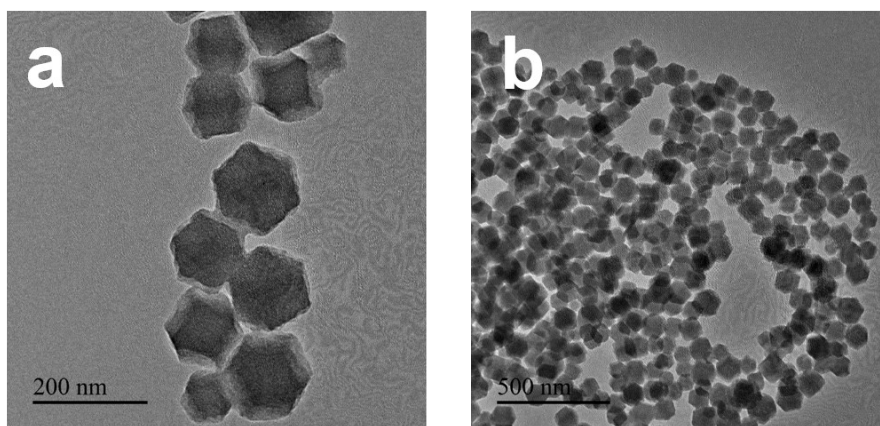

Fig. S3 TEM images of  $\text{Fe}_2\text{-N-C@mSiO}_2$ .

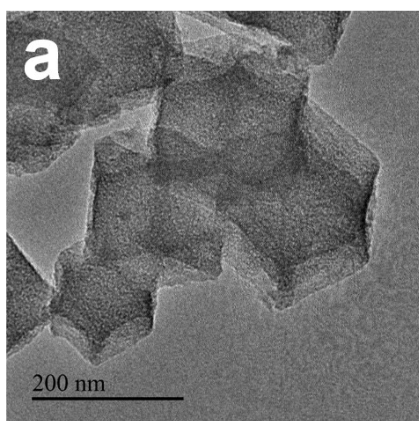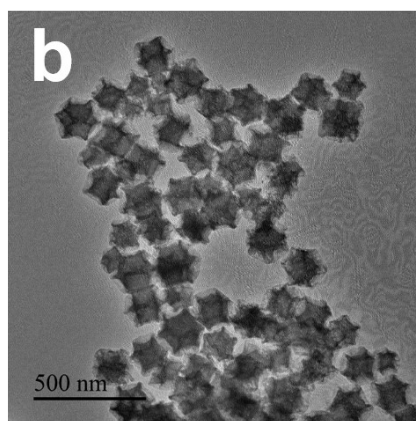

Fig. S4 TEM images of Fe<sub>2</sub>-N-C.

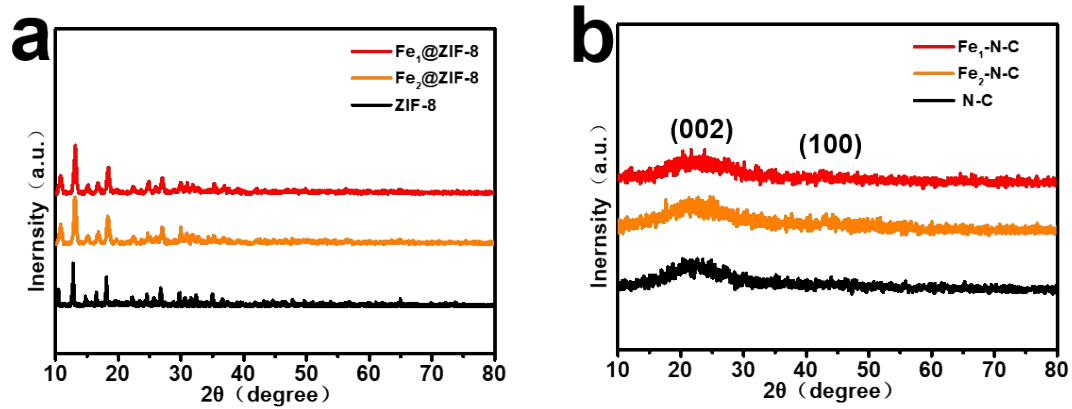

Fig. S5 (a) XRD pattern of ZIF-8, Fe(acac)<sub>3</sub>-ZIF-8, and Fe<sub>2</sub>(CO)<sub>9</sub>-ZIF-8 N-C. (b) XRD pattern of N-C, Fe<sub>1</sub>-N-C and Fe<sub>2</sub>-N-C.

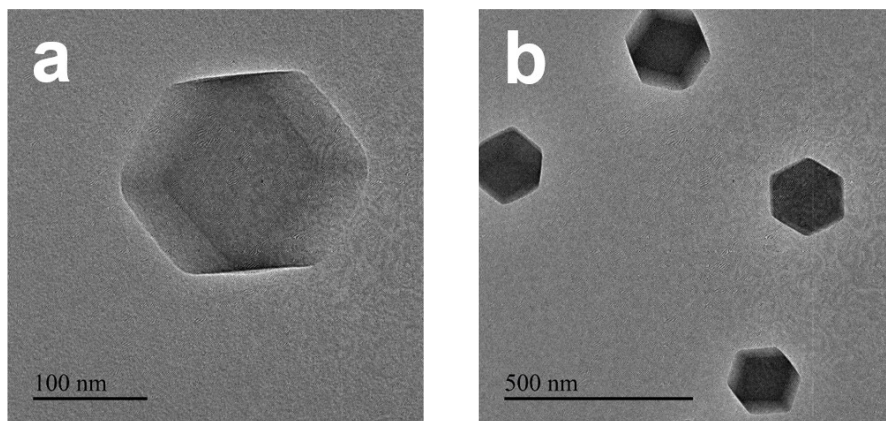

Fig. S6 TEM images of Fe(acac)<sub>3</sub>-ZIF-8.

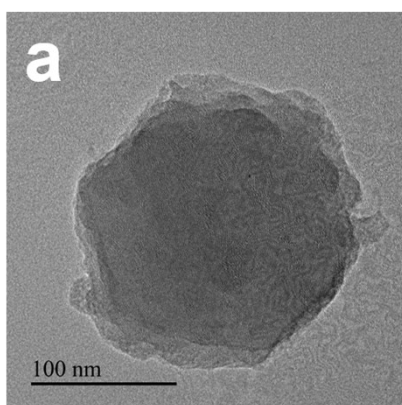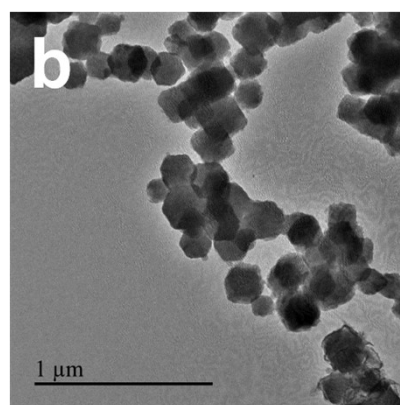

Fig. S7 TEM images of Fe(acac)<sub>3</sub>-ZIF-8@mSiO<sub>2</sub>.

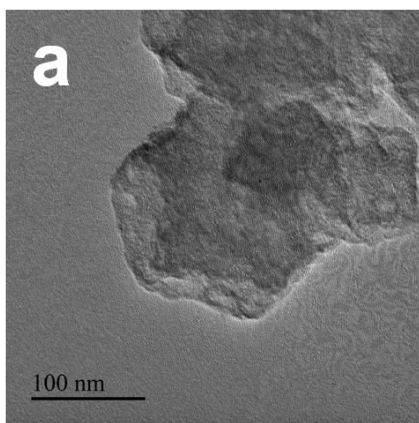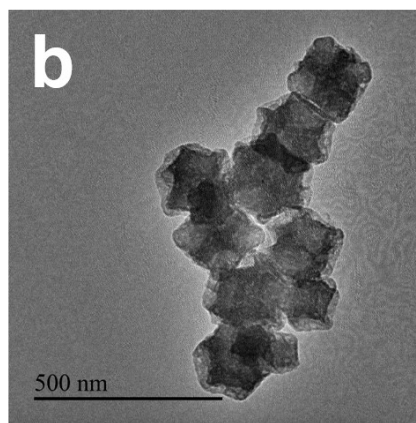

Fig. S8 TEM images of  $\text{Fe}_1\text{-N-C@mSiO}_2$ .



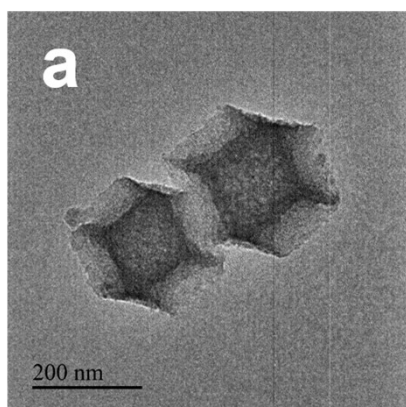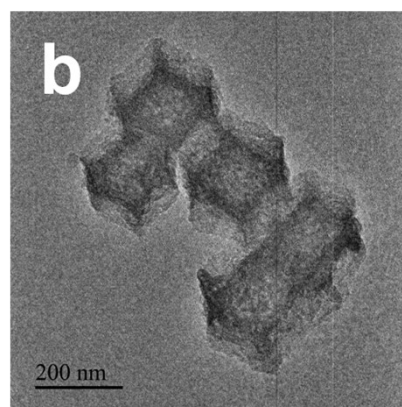

Fig. S9 TEM images of Fe<sub>1</sub>-N-C.

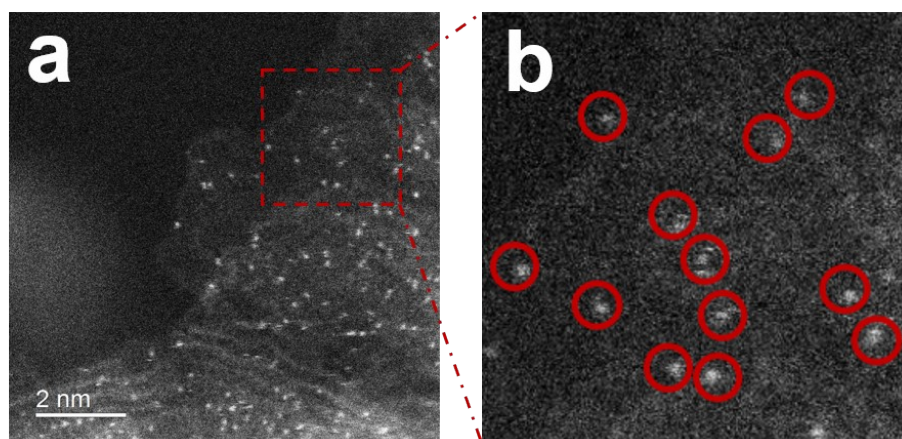

Fig. S10 (a) Atomic-resolution HAADF-STEM images of Fe<sub>1</sub>-N-C. (g) Magnified atomic-resolution HAADF-STEM images of Fe<sub>1</sub>-N-C.

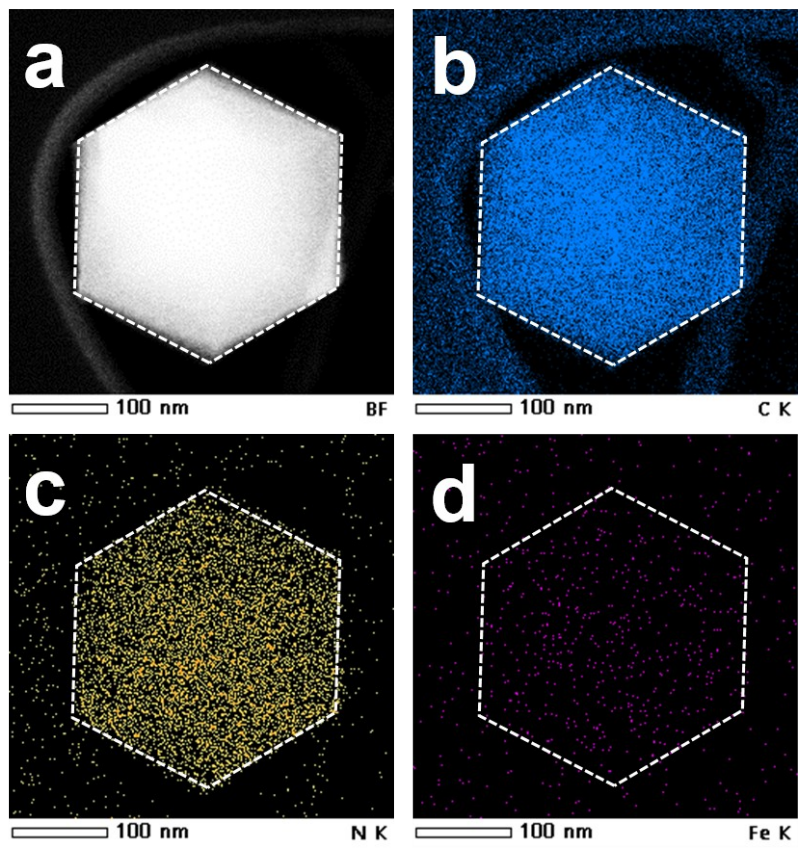

Fig. S11 (a) HAADF-STEM images of Fe<sub>1</sub>-N-C. (b) The elemental mapping of Fe<sub>1</sub>-N-C (including C, N and Fe elements).

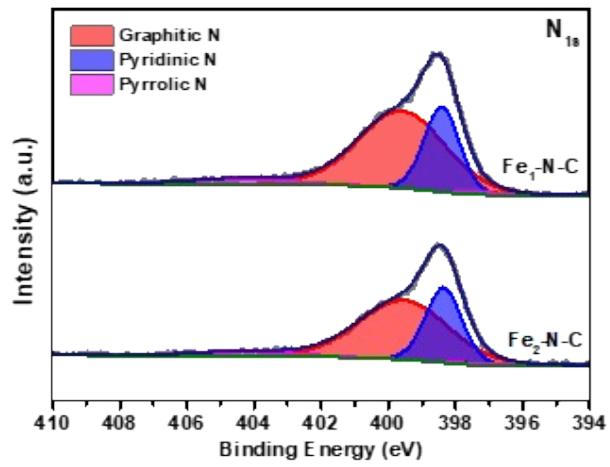

Fig. S12 XPS characterization of Fe<sub>x</sub>-N-C sample.

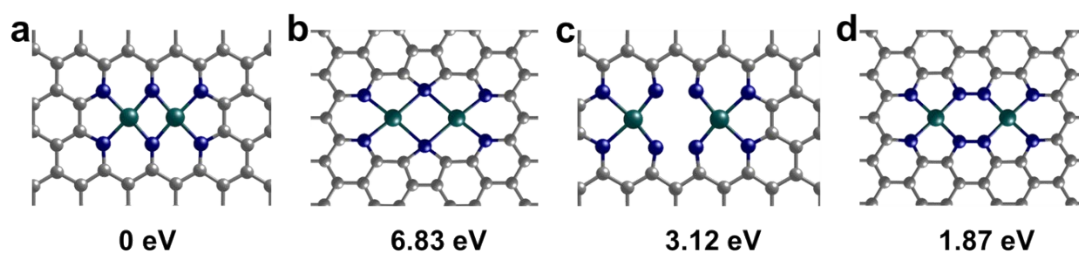

Fig. S13 According to the coordination structure of Fe<sub>2</sub>N<sub>6</sub>, we constructed four possible structural models. Through the stability comparison, it is found that the (a) model is the most stable, so we choose the first structure as the subsequent calculation model.

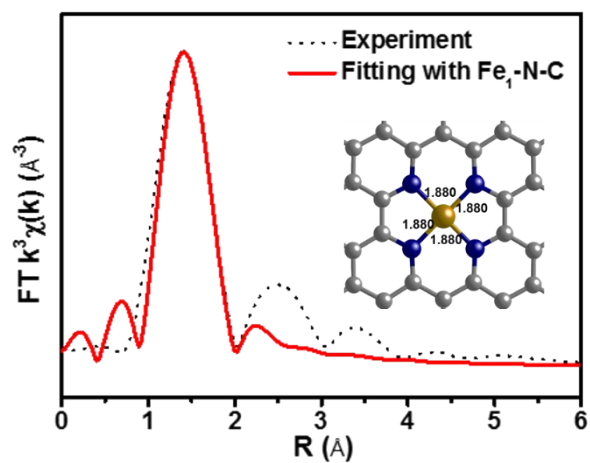

Fig. S14 The corresponding EXAFS fitting curves of Fe<sub>1</sub>-N-C at  $k$  space and crystalline structures modeling of Fe<sub>1</sub>-N-C for theoretical fitting analysis of EXAFS.

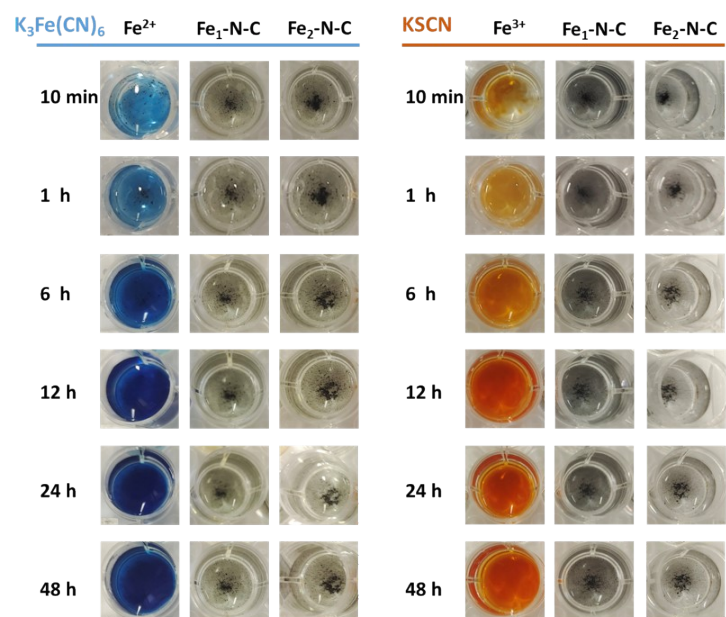

Fig. S15 The photos of potassium ferricyanide ( $K_3Fe(CN)_6$ ) (a) and potassium thiocyanate ( $KSCN$ ) (b) for monitoring the time-course ferrous and ferric ion releasing behaviors of  $Fe_x-N-C$  under pH 5.8 conditions.

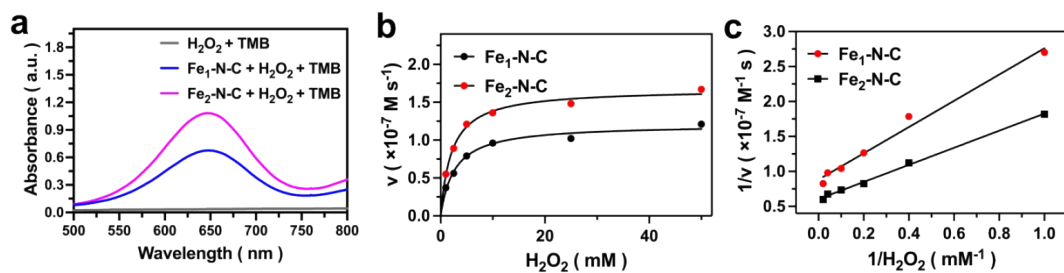

Fig. S16 (a) Absorbance spectra of TMB in different catalytic systems in the presence of  $\text{H}_2\text{O}_2$ . (b) Kinetic curves of  $\text{Fe}_x\text{-N-C}$  toward  $\text{H}_2\text{O}_2$ . (c) Lineweaver–Burk plot for  $\text{Fe}_x\text{-N-C}$  with  $\text{H}_2\text{O}_2$  as a substrate.



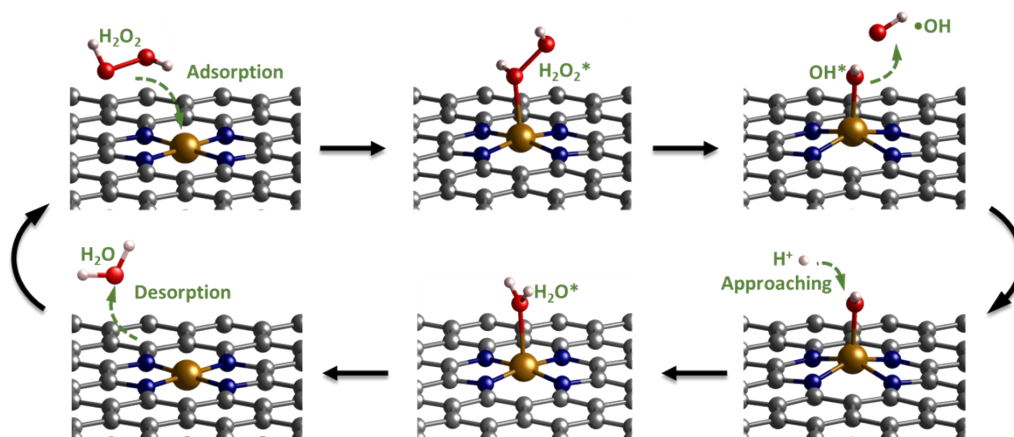

Fig. S17 The proposed catalytic mechanism for Fenton-like reaction of Fe<sub>1</sub>-N-C.

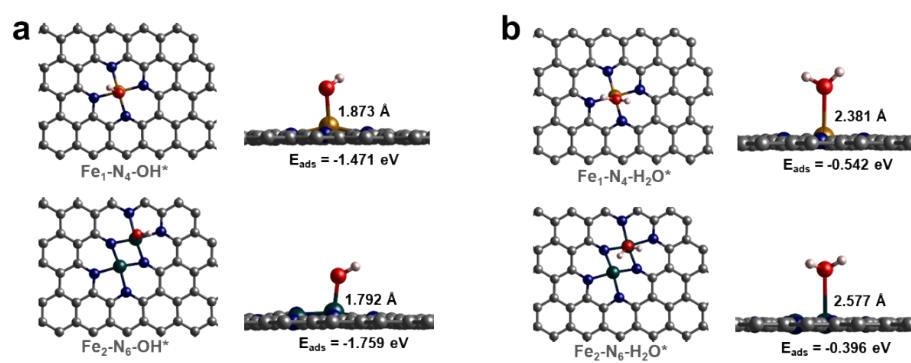

Fig. S18 OH\* and H<sub>2</sub>O\* adsorption models in Fe<sub>1</sub>-N-C and Fe<sub>2</sub>-N-C.

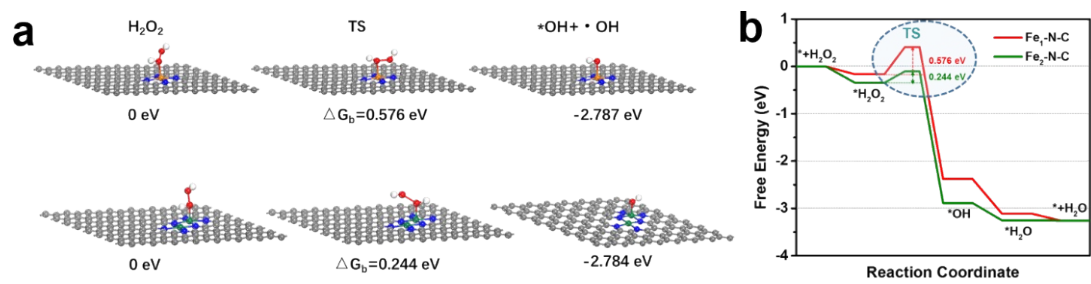

Fig. S19 Atomic structures of the initial state (left panel), transition state (middle panel), and final state (right panel) for:  $*\text{H}_2\text{O}_2 \rightarrow *\text{OH} + \bullet\text{OH}$  on the Fe site in  $\text{Fe}_1\text{-N-C}$  and  $\text{Fe}_2\text{-N-C}$ .

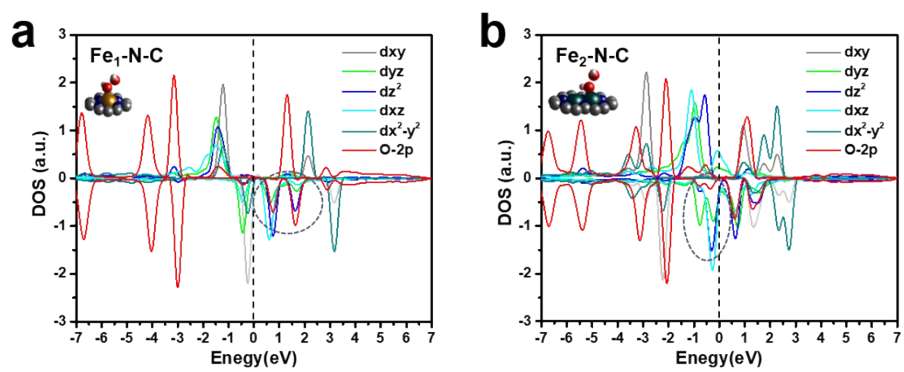

Fig. S20 (a-b) Computed projected density of states of  $\text{Fe}_1\text{-N-C}$  (a) and  $\text{Fe}_2\text{-N-C}$  (b) after  $\text{H}_2\text{O}_2^*$  adsorption.

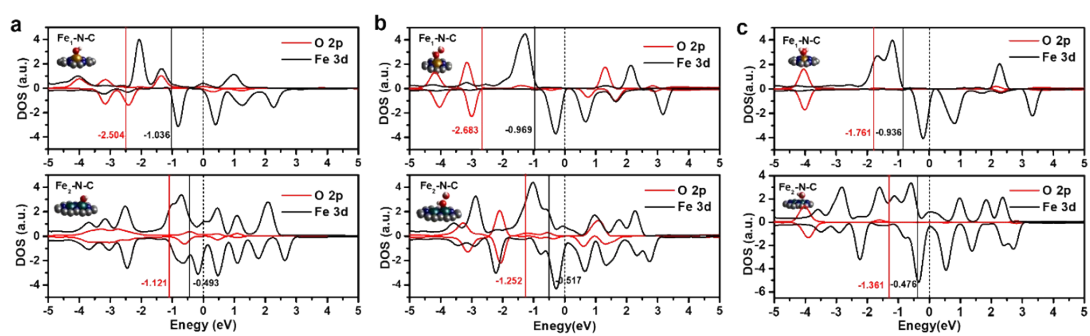

Fig. S21 The PDOS of OH\* (a), H<sub>2</sub>O<sub>2</sub>\* (b), and H<sub>2</sub>O(c) adsorption state for Fe<sub>1</sub>-N-C and Fe<sub>2</sub>-N-C (The Fermi level is shown as the dash line. The *d*-band centers of Fe and the *p*-band centers of O are marked as solid lines for each sample).

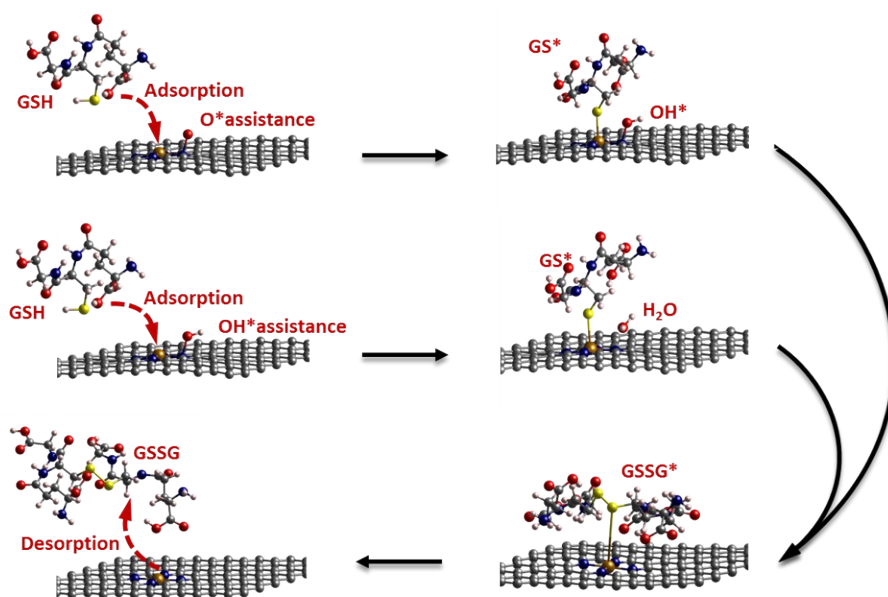

Fig. S22 The proposed catalytic mechanism for GSH consumption of Fe<sub>1</sub>-N-C.

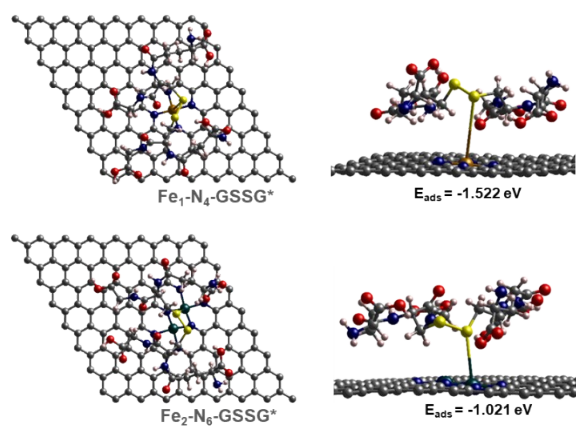

Fig. S23 GSSG\* adsorption models in  $\text{Fe}_1\text{-N-C}$  and  $\text{Fe}_2\text{-N-C}$ .

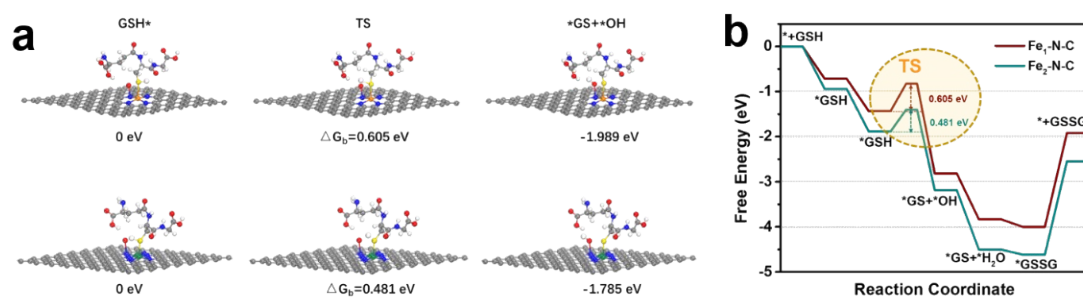

Fig. S24 Atomic structures of the initial state (left panel), transition state (middle panel), and final state (right panel) for:  $*GSH + O^* \rightarrow *GS + *OH$  on the Fe site in Fe<sub>1</sub>-N-C and Fe<sub>2</sub>-N-C.



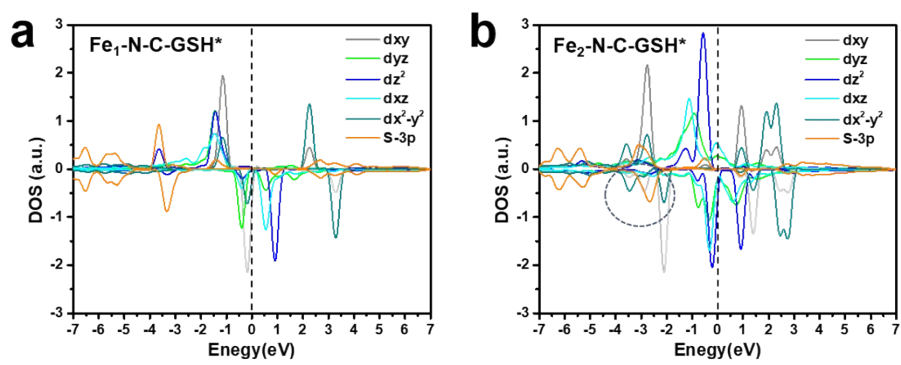

Fig. S25 (a-b) Computed projected density of states of Fe<sub>1</sub>-N-C (a) and Fe<sub>2</sub>-N-C (b) after GSH\* adsorption.

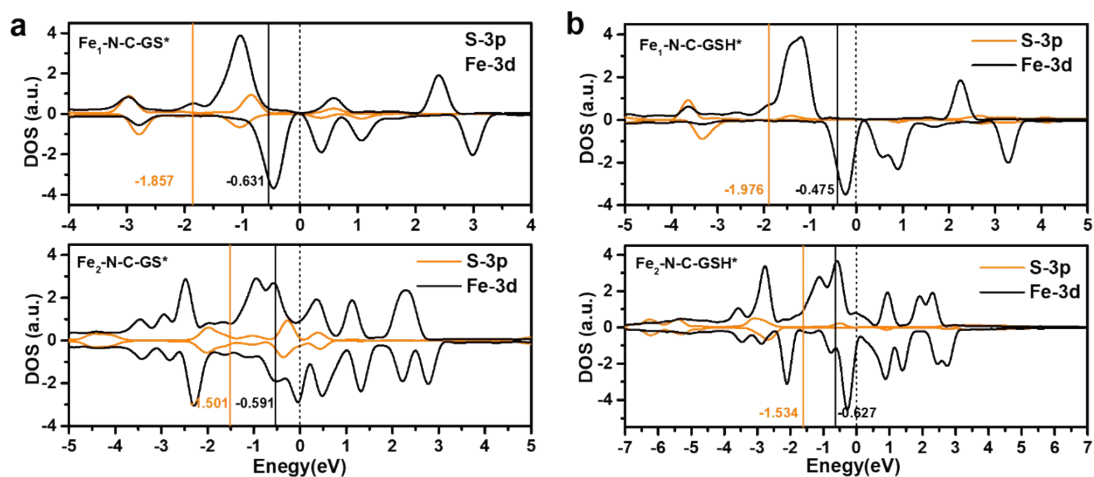

Fig. S26 The PDOS of GS\* (a) and GSH\* (b) adsorption state for Fe<sub>1</sub>-N-C and Fe<sub>2</sub>-N-C. The Fermi level is shown as the dash line. The *d*-band centers of Fe and the *p*-band centers of S are marked as solid lines for each sample.

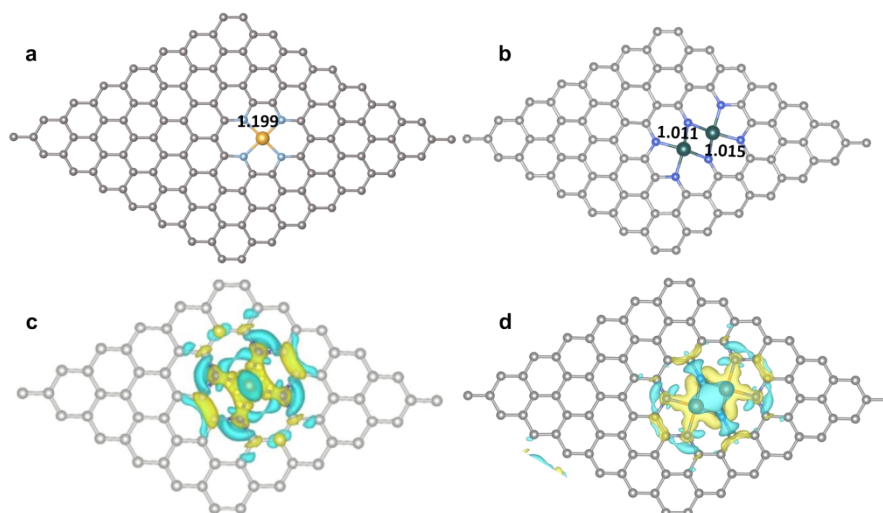

Fig. S27 Computed atomic net charge on Fe site in Fe<sub>1</sub>-N-C (a) and Fe<sub>2</sub>-N-C (b). Computed charge density differences for Fe<sub>1</sub>-N-C (c) and Fe<sub>2</sub>-N-C (d). Cyan and yellow areas represent charge density increase and decrease, respectively.

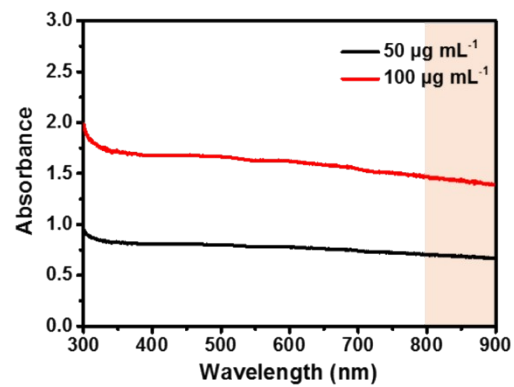

Fig. S28 UV-vis spectra of Fe<sub>2</sub>-N-C dispersed in PBS at different concentrations.

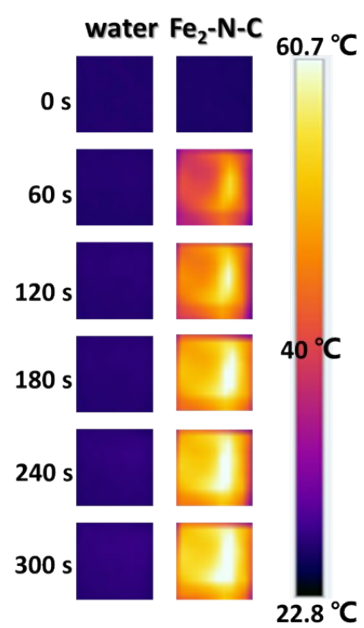

Fig. S29 Temperature change of Fe<sub>2</sub>-N-C aqueous solution (200 µg mL<sup>-1</sup>) irradiated with an 808 nm laser (1 W cm<sup>-2</sup>) within 5 min.

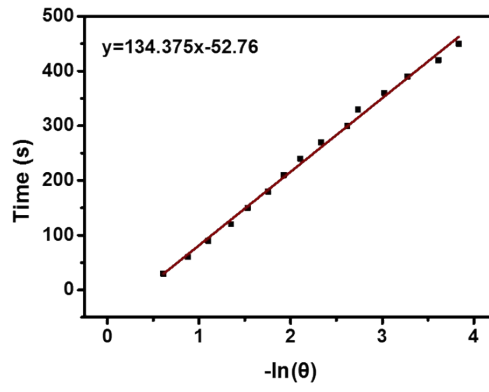

Fig. S30 Linear fit of time/ $-\ln(\theta)$  obtained during the cooling process.

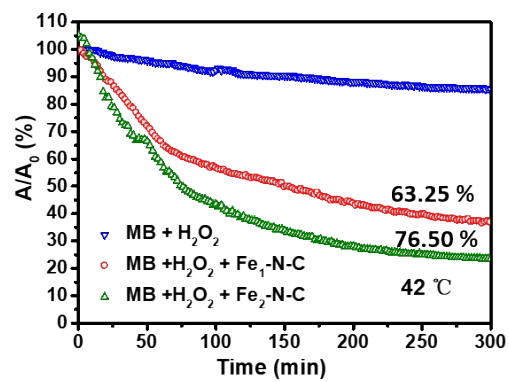

Fig. S31 Normalized absorbance of MB ( $A/A_0$ ) upon the addition of Fe<sub>x</sub>-N-C and H<sub>2</sub>O<sub>2</sub> buffered in acidic PBS (pH = 5.8) under 42 °C.

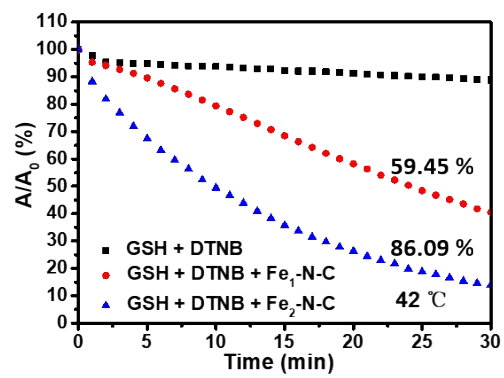

Fig. S32 Normalized absorbance of TNB ( $A/A_0$ ) upon the addition of Fe<sub>x</sub>-N-C and GSH buffered in acidic PBS (pH = 5.8) under 42 °C.



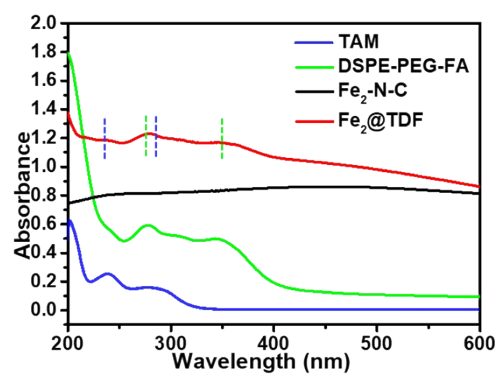

Fig. S33 UV-Vis spectra of TAM, DSPE-PEG-FA, Fe<sub>2</sub>-N-C and Fe<sub>2</sub>@TDF NEs.

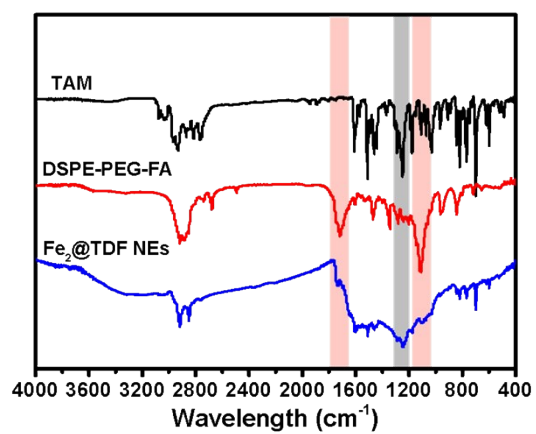

Fig. S34 FT-IR spectra of TAM, DSPE-PEG-FA, and Fe<sub>2</sub>@TDF NEs.

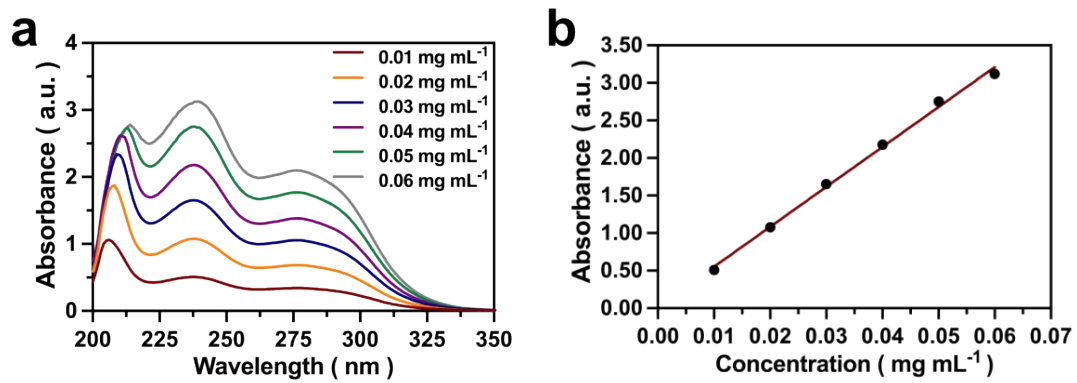

Fig. S35 (a) The UV-vis absorption spectra the different concentrations of free TAM and (b) the relevant standard curve at 238 nm.

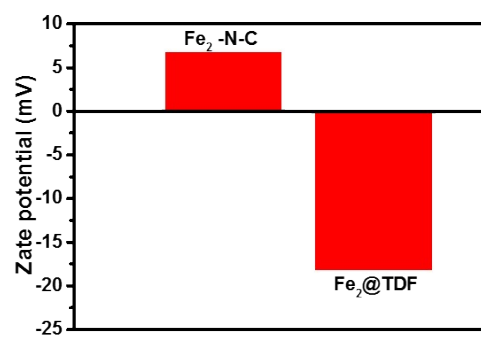

Fig. S36 The Zeta potential of Fe<sub>2</sub>-N-C and Fe<sub>2</sub>@TDF NEs in aqueous solution.

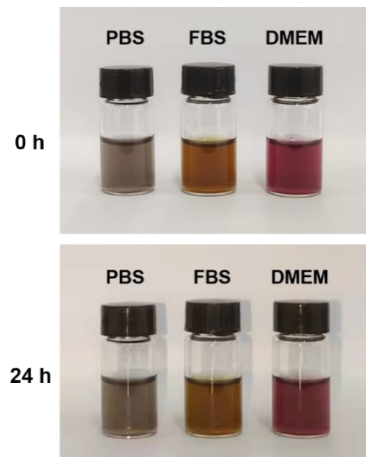

Fig. S37 Stability characterization of the Fe<sub>2</sub>@TDF NEs dispersed in PBS, FBS, and DMEM medium, respectively.

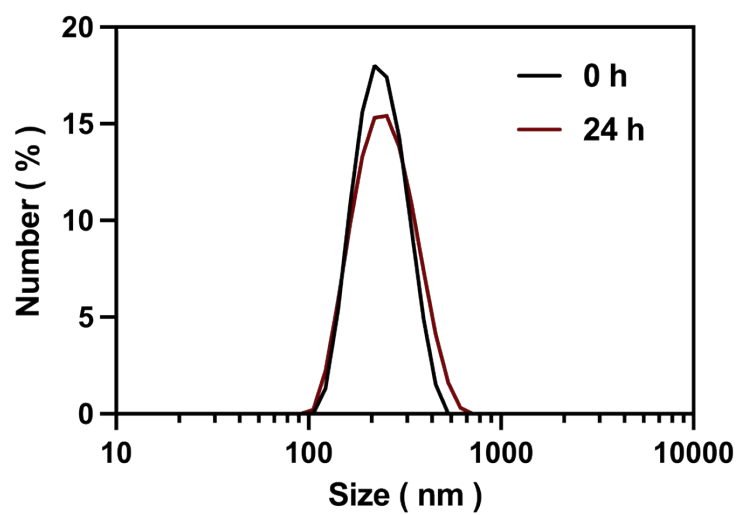

Fig.S38 Dynamic light scattering (DLS) of as-prepared Fe<sub>2</sub>@TDF NEs stand for 0 h and 24 h.

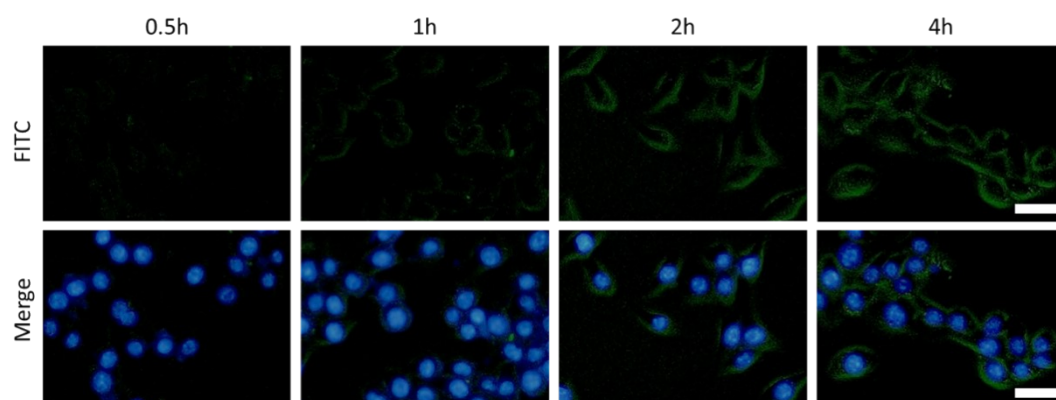

Fig. S39 Fluorescence images of 4T1 cells co-incubated with FITC labeled  $\text{Fe}_2\text{@TDF}$  NEs. (scale bars: 20  $\mu\text{m}$ )

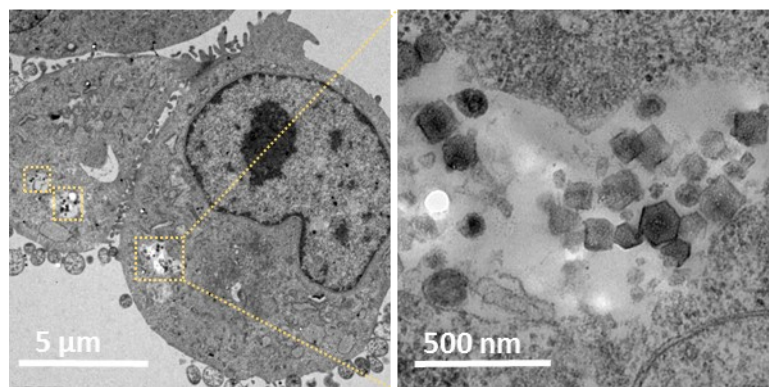

Fig. S40 The Bio-TEM images of 4T1 cells treated with Fe<sub>2</sub>@TDF NEs.



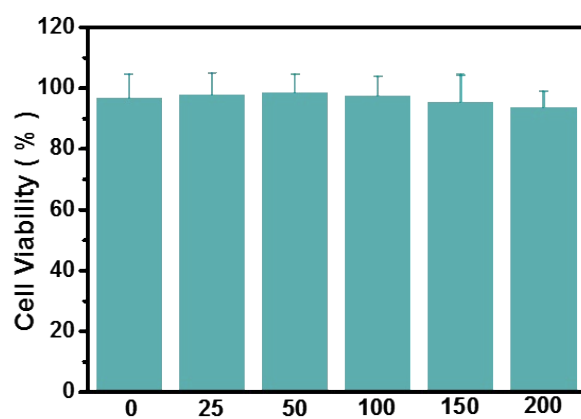

Fig. S41 Cytotoxicity assessment on LO2 cells with various concentrations of Fe<sub>2</sub>@TDF NEs.

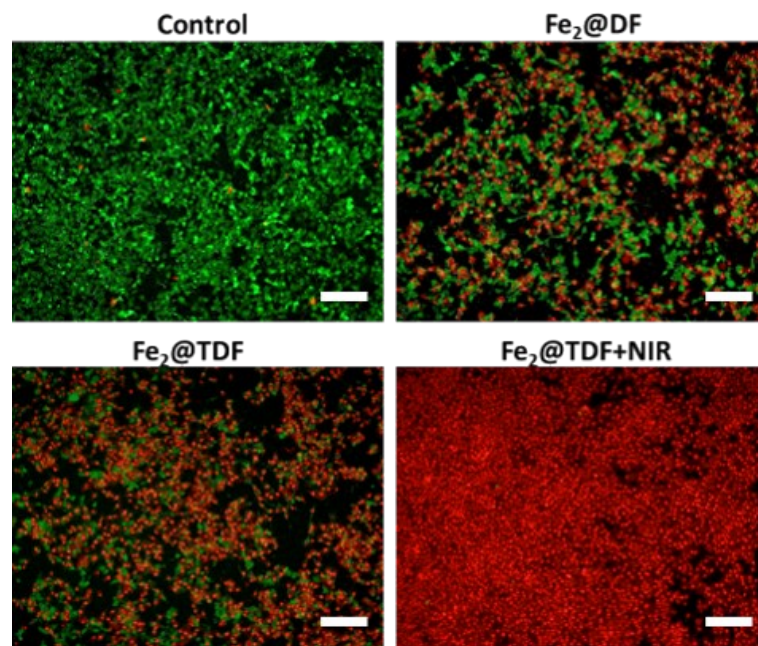

Fig. S42 Fluorescence images of Calcein AM (green, live cells) and PI (red, dead cells) after incubation with different materials for 24 h (Scale bars: 200  $\mu$ m).

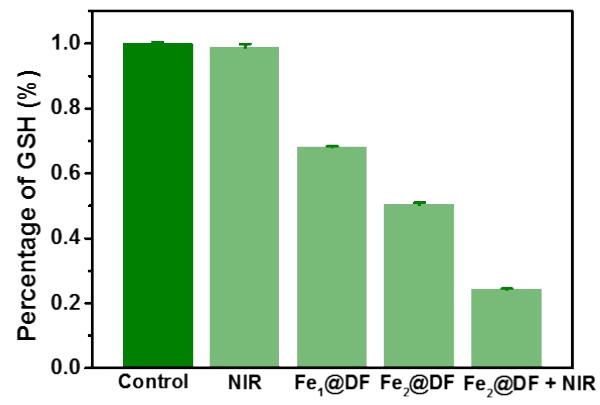

Fig. S43 Intracellular GSH detections of 4T1 cells with different treatments.

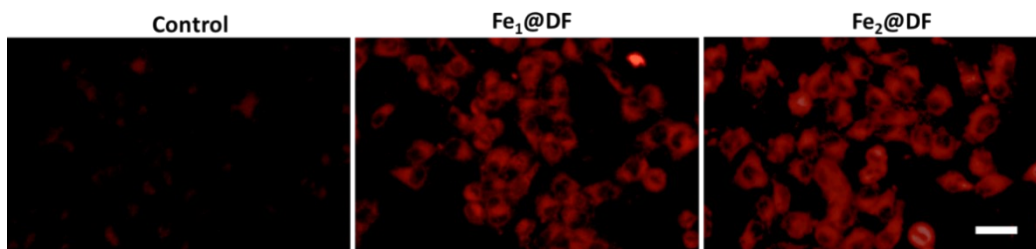

Fig. S44 The fluorescent images of C11-BODIPY labeled 4T1 cells after incubation with various materials (scale bars: 20  $\mu\text{m}$ ).

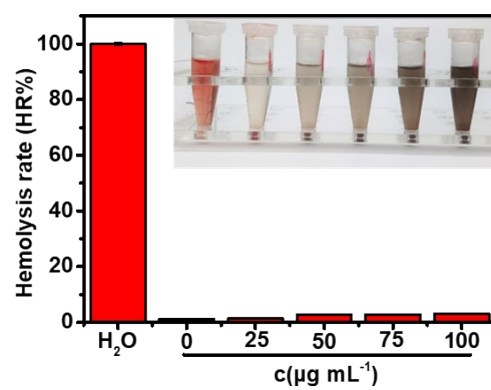

Fig. S45 Hemolysis rates of the RBC suspensions after treatment with various concentration of  $\text{Fe}_2\text{@TDF}$  (Inset: corresponding photograph of RBC samples).

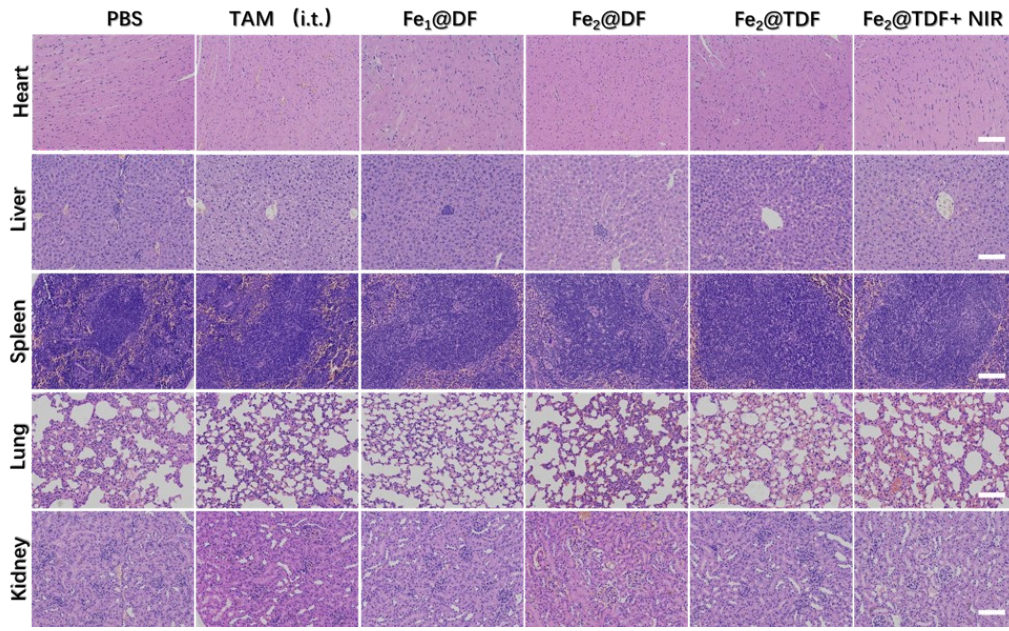

Fig. S46 Histological analysis of the major healthy organ via H&E staining after various treatments (Scale bars: 100  $\mu$ m).

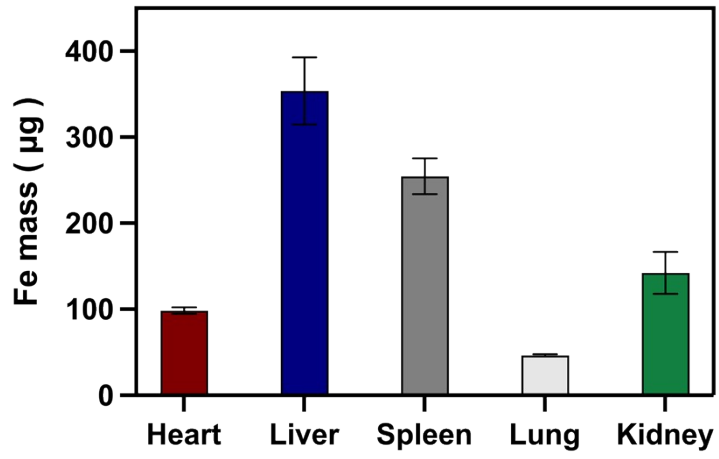

Fig. S47 The biodistribution of Fe in the major organs.

Table S1 Fitting parameters of Fe k-edge EXAFS curve fitting for Fe-foil, Fe<sub>1</sub>-N-C and Fe<sub>2</sub>-N-C samples.

| <b>Sample</b> | <b>Path</b> | <b>C.N.</b> | <b>R (Å)</b> | <b><math>\sigma^2 \times 10^3</math> (Å<sup>2</sup>)</b> | <b><math>\Delta E</math> (eV)</b> | <b>R factor</b> |
|---------------|-------------|-------------|--------------|----------------------------------------------------------|-----------------------------------|-----------------|
| Fe foil       | Fe-Fe       | 8*          | 2.47±0.01    | 5.2±0.6                                                  | 6.7±1.0                           | 0.001           |
|               | Fe-Fe       | 6*          | 2.84±0.01    | 6.4±1.2                                                  | 5.0±2.0                           |                 |
| Fe1-N-C       | Fe-N/O      | 4.6         | 1.97±0.02    | 2.5±6.3                                                  | 1.0±4.8                           | 0.012           |
| Fe2-N-C       | Fe-N/O      | 5.2         | 1.98±0.03    | 12.0±0.1                                                 | 1.4±3.9                           | 0.0098          |
|               | Fe-Fe       | 1.2         | 2.51±0.02    | 4.9±2.7                                                  | -2.0±4.2                          |                 |



Table S2 The mass percentages (%) of Fe and specific surface in Fe<sub>1</sub>-N-C and Fe<sub>2</sub>-N-C samples.

| <b>Sample</b>        | <b>Fe mass percentage (%)</b> |
|----------------------|-------------------------------|
| Fe <sub>1</sub> -N-C | 0.410                         |
| Fe <sub>2</sub> -N-C | 0.375                         |

Table S3 The molar percentages (%) of pyridinic N, graphitic N and pyrrolic N in Fe<sub>1</sub>-N-C and Fe<sub>2</sub>-N-C samples.

| <b>Sample</b>        | <b>Pyridinic N</b> | <b>Graphitic N</b> | <b>Pyrrolic N</b> |
|----------------------|--------------------|--------------------|-------------------|
| Fe <sub>1</sub> -N-C | 29.18              | 65.20              | 5.62              |
| Fe <sub>2</sub> -N-C | 31.88              | 62.47              | 5.65              |

**Table S4** The Michaelis-Menton constant ( $K_m$ ) and maximum reaction rate ( $V_{max}$ ) of as prepared  $Fe_x$ -N-C and natural HRP with  $H_2O_2$  as the substrate for POD-like catalysis.

| <b>Sample</b> | <b>Substrate</b> | <b>Km (mM)</b> | <b>Vmax (<math>M s^{-1}</math>)</b> | <b>Reference</b>               |
|---------------|------------------|----------------|-------------------------------------|--------------------------------|
| $Fe_1$ -N-C   | $H_2O_2$         | 2.664          | $1.208 \times 10^{-7}$              | This work                      |
| $Fe_2$ -N-C   | $H_2O_2$         | 2.118          | $1.675 \times 10^{-7}$              | This work                      |
| HRP           | $H_2O_2$         | 3.71           | $8.71 \times 10^{-8}$               | Nat. Nanotechnol., 2007, 2,577 |

#### **4. Supplementary References**

1. Kresse, G.; Furthmüller, J. Efficiency of Ab-Initio Total Energy Calculations for Metals and Semiconductors Using a Plane-Wave Basis Set. *Comput. Mater. Sci.* 1996, 6, 15-50.
2. Kresse, G.; Furthmüller, J. Efficient Iterative Schemes for Ab Initio Total-Energy Calculations Using a Plane-Wave Basis Set. *Phys. Rev. B* 1996, 54, 11169-11186.
3. Perdew, J. P.; Burke, K.; Ernzerhof, M. Generalized Gradient Approximation Made Simple. *Phys. Rev. Lett.* 1996, 77, 3865-3868.
4. Kresse, G.; Joubert, D. From Ultrasoft Pseudopotentials to the Projector Augmented-Wave Method. *Phys. Rev. B* 1999, 59, 1758-1775.
5. Blöchl, P. E. Projector Augmented-Wave Method. *Phys. Rev. B* 1994, 50, 17953-17979.
